# Supplementary material for: Tofla virus: A newly identified Nairovirus of the Crimean-Congo hemorrhagic fever group isolated from ticks in Japan
Source: PubMed Central journal article supplement (PMC4809068; doi:10.1038/srep20213), 2016-02-11

## Supplementary information for

### Title

Tofla virus: A newly identified *Nairovirus* of the Crimean-Congo hemorrhagic fever group isolated from ticks in Japan

### Authors

Satoshi Shimada<sup>1,8</sup>, Kotaro Aoki<sup>1</sup>, Takeshi Nabeshima<sup>1</sup>, Yu Fuxun<sup>1</sup>, Yohei Kurosaki<sup>2</sup>, Kazuya Shiogama<sup>3</sup>, Takanori Onouchi<sup>3</sup>, Miako Sakaguchi<sup>4</sup>, Takeshi Fuchigami<sup>5</sup>, Hokuto Ono<sup>5</sup>, Kodai Nishi<sup>6</sup>, Guillermo Posadas-Herrera<sup>1+</sup>, Leo Uchida<sup>1</sup>, Yuki Takamatsu<sup>1</sup>, Jiro Yasuda<sup>2,8</sup>, Yutaka Tsutsumi<sup>3</sup>, Hiromi Fujita<sup>7</sup>, Kouichi Morita<sup>1,8</sup> and Daisuke Hayasaka<sup>1,8\*</sup>

### Affiliation

<sup>1</sup>Department of Virology, <sup>2</sup>Department of Emerging Infectious Diseases, <sup>4</sup>Central Laboratory, Institute of Tropical Medicine, <sup>8</sup>Leading graduate school program, Nagasaki University, 1-12-4 Sakamoto, Nagasaki, 852-8523, Japan.

<sup>3</sup>Department of Pathology, Fujita Health University School of Medicine, 1-98 Dengakugakubo, Kutsukake-cho, Toyoake, Aichi, 470-1192, Japan.

<sup>5</sup>Department of Hygienic Chemistry, Graduate School of Biomedical Sciences, Nagasaki University. 1-14 Bunkyo-machi, Nagasaki, 852-8521, Japan.

<sup>6</sup>Department of Radioisotope Medicine, Atomic Bomb Diseases Institute, Nagasaki University, 1-12-4 Sakamoto, Nagasaki, 852-8523, Japan.

<sup>7</sup>Mahara Institute of Medical Acarology, 56-3 korekuni Aratano-cho, Anan, Tokushima 779-1510, Japan.

\*Corresponding author: Daisuke Hayasaka, Department of Virology, Institute of Tropical Medicine, Nagasaki University, 1-12-4 Sakamoto, Nagasaki, 852-8523, Japan. Phone number: +81-95-819-7828. Fax number: +81-95-819-7830. E-mail address: hayasaka@nagasaki-u.ac.jp

Supplementary figure 1

*Heamaphysalis formsensis*

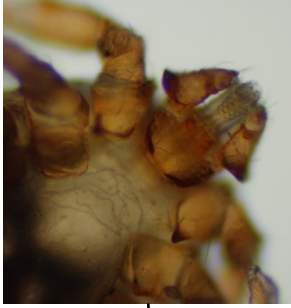

*Heamaphysalis flava*

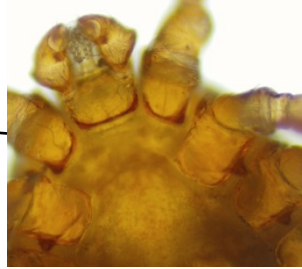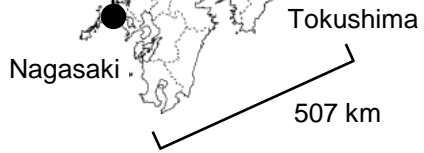

Supplementary figure 2

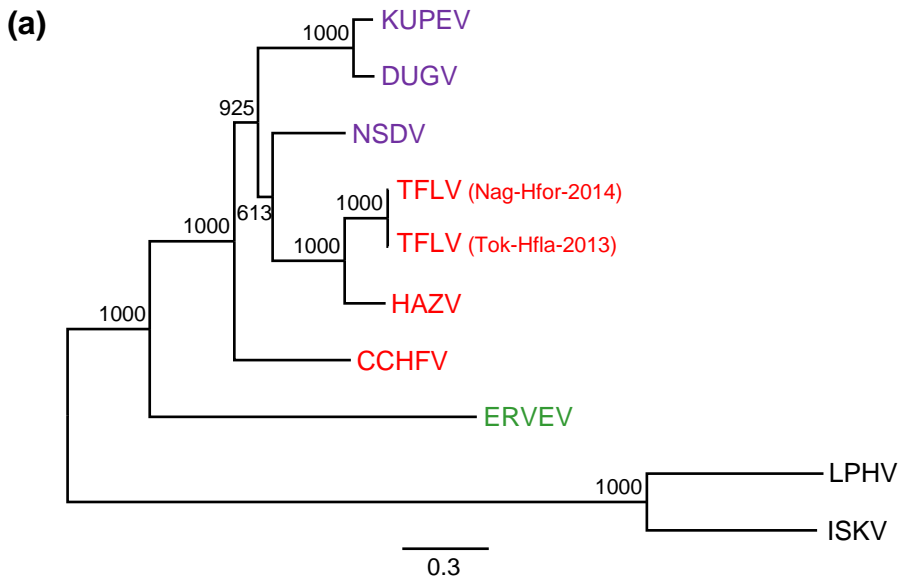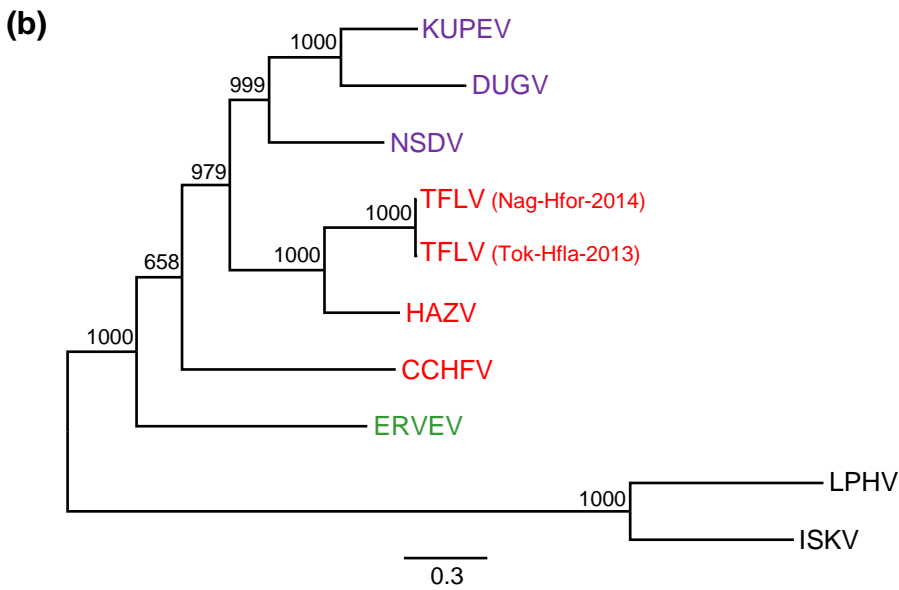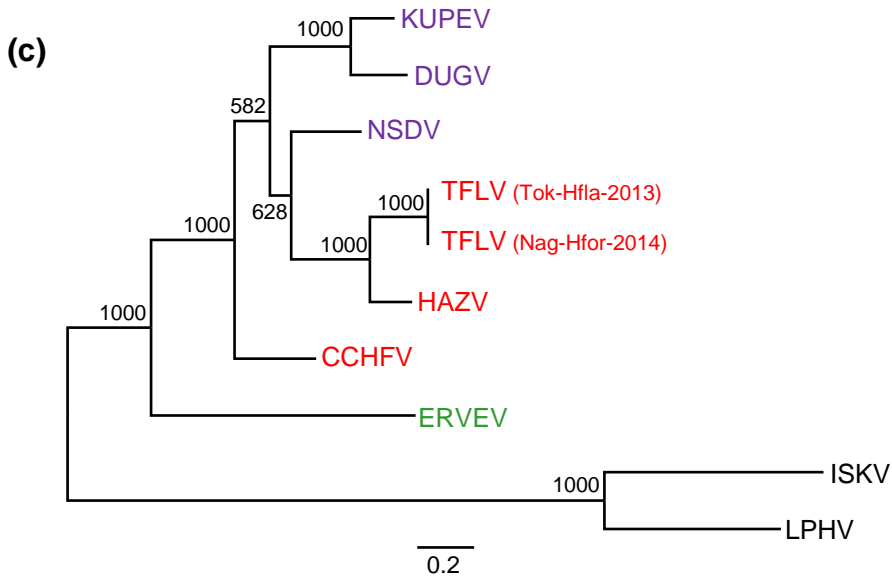

Supplement: srep20213-s1.pdf [file srep20213-s1.pdf]
